# 1 **Lateral mechanical impedance rather than frontal,** 2 **promotes cortical expansion of roots**

3 Xuanjun Feng<sup>1,2,3,¶</sup>, Jing Xiong<sup>1,2,3,¶</sup>, Yue Hu<sup>1,2,3</sup>, Liteng Pan<sup>1,2,3</sup>, Zhengqiao Liao<sup>1,2,3</sup>,  
4 Xuemei Zhang<sup>1,2,3</sup>, Wei Guo<sup>1,2,3</sup>, Fengkai Wu<sup>1,2,3</sup>, Jie Xu<sup>1,2,3</sup>, Erliang Hu<sup>2,3</sup>, Hai Lan<sup>2,3</sup>,  
5 Yanli Lu<sup>1,2,3\*</sup>

6 <sup>1</sup>State Key Laboratory of Crop Gene Exploration and Utilization in Southwest China,  
7 Sichuan Agricultural University. Wenjiang, Sichuan, China.

8 <sup>2</sup>Maize Research Institute, Sichuan Agricultural University, Wenjiang, Sichuan,  
9 China.

10 <sup>3</sup>Key Laboratory of Biology and Genetic Improvement of Maize in Southwest Region,  
11 Ministry of Agriculture, China.

12 ¶These authors contributed equally to this work.

13 \*Corresponding author

14 E-mail: [yanli.lu82@hotmail.com](mailto:yanli.lu82@hotmail.com) (YL)

15

## 16 **Abstract**

17 It has long been considered that mechanical impedance on root will restrict  
18 root elongation and consequently promote radial growth. However, we did observe  
19 radial expansion but not elongation restriction in maize seedlings after short growth in  
20 sands. Mechanical impedance of soil can be classified into frontal- and lateral-type  
21 based on the interaction site of root. Therefore, we suspected that radial expansion  
22 might be mainly stimulated by lateral rather than frontal impedance. To verify our  
23 speculation, frontal and lateral impedance was provided separately. Small plastic caps  
24 were used to provide unique frontal impedance on root tip and cylindrical plastic  
25 containers were used to provide lateral impedance. Plastic caps could reduce root  
26 length remarkably. However, the radial expansion of plastic-cap-fitted roots was  
27 significantly inferior to that of the sand-cultured roots. Microstructural analysis  
28 revealed that sand-condition thickened root largely depends on cortical expansion,

29 whereas plastic cap did it mainly by thickening stele. In cylindrical plastic containers,  
30 mechanical impedance came only from the lateral direction and promoted the  
31 expansion of cortex just as sand-condition. Thus, we proposed that the expansion of  
32 the cortex and the consequent radial growth is mainly due to lateral impedance when  
33 growing in sands.

## 34 **Introduction**

35         The growth of roots in soil can be limited by the physical, chemical, and  
36 biological properties of soil, among which physical properties have been reported to  
37 be most strongly linked to root elongation [1-3]. In terms of the physical limitations  
38 on root growth, mechanical impedance (caused by soil that is too compact to enable  
39 rapid root penetrance) mainly affects root systems by hindering root elongation and  
40 concurrently promoting root thickening [1,3,4]. Soil is a dense medium, and it is  
41 necessary for root tips to generate sufficiently mechanical force to penetrate through  
42 the soil in the absence of continuous pores of a sufficiently large diameter [1,5].  
43 Intuitively, thin roots, given their cross section, may penetrate soil easier as they  
44 encounter less resistance than do thicker roots. Moreover, thin roots will reorient their  
45 growth easily to circumnavigate the obstacle [1,5]. Therefore, it sounds contradictory  
46 that roots grow thicker in response to mechanical impedance [1,4,6]. Indeed, previous  
47 experimental evidences related to the effect of root diameter on penetration resistance  
48 were often contradictory [1,7]. But recently, more studies on different plant species  
49 have indicated that thicker roots rather than thinner roots can more effectively  
50 penetrate compact soil layers [4,8].

51         Actually, mechanical impedance of soil can be classified into frontal- and  
52 lateral-type based on the position of root, and frictional (lateral) impedance between  
53 roots and the soil may account for up to 80% of total mechanical impedance [4,9]. All  
54 previous studies on mechanical impedance have obtained data from plants in which  
55 the entire root system has been embedded in various substrates, such as glass beads,  
56 soil, sands, and phytigel [1,3-5,10]. In these studies, it was not possible to distinguish  
57 the effects of frontal and lateral impedance. So, It is not entirely clear as to whether

58 frontal mechanical impedance acts as a direct cue to restrict root elongation and  
59 promote radial expansion. In this study, the objective was to determine which of the  
60 frontal- or lateral- impedance was the main stimuli on radial expansion of root.

## 61 **Materials and methods**

### 62 **Plant materials and growth conditions**

63 To produce the seedlings used in this study, we germinated maize seeds in  
64 rolled-up germinating test paper, so as to generate seedlings with relatively straight  
65 roots of approximately 3 to 5 cm in length. These seedlings were then subjected to  
66 different growth conditions (water-, sand-, semi-sand and cap-fitted-conditions).  
67 Silica sand with a particle size about 2 mm in diameter was used for sand and  
68 semi-sand conditions. The maize seedlings were grown in a greenhouse at  
69 approximately 26°C under a 14-h light/10-h dark photoperiod. Schematic diagrams of  
70 plastic cap and cylindrical plastic container were showed in Figure 1a and 1b,  
71 respectively. Plastic cap was used for cap-fitted condition. It was prepared in the  
72 following manner: a rubber tube with a 3 mm inner diameter was cut into 1 cm  
73 lengths and one end of the 1 cm rubber tube was blocked. Then, a tiny elastic thread  
74 was fixed to two flanks of the plastic cap. When used, plastic cap was fitted on root  
75 tip and elastic thread was attached to the raft where seedlings were anchored (Fig 1D).  
76 The cylindrical plastic container was used for semi-sand condition. It was prepared in  
77 the following manner: first, plastic pipe with a 20 mm inner diameter was cut into 5  
78 cm lengths; second, one end of the 5 cm plastic pipe was blocked by a plastic sheet  
79 and scotch tape; at last, making a hole in the center of the plastic sheet about 3 mm.  
80 When used, root of seedling was buried in the cylindrical plastic container with sands  
81 and root tip was exposed to the outside through a hole (Fig 1E). Four kinds of growth  
82 conditions were showed in Fig 1.

### 83 **Preparation of paraffin sections**

84 Segments of root from the root tip and the region (1 cm in length) near the

85 root–hypocotyl junction were collected from three biological replications (5 seedlings  
86 were used in each replication) and stored in Carnoy’s fixative (ethanol: glacial acetic  
87 acid = 3:1) at room temperature for 12 h. The samples were then subjected to an  
88 ethanol gradient, consisting of 75% ethanol for 4 h, 85% ethanol for 4 h, 100%  
89 ethanol overnight, and 100% ethanol + basic fuchsin for 4 h. Thereafter, the samples  
90 were transferred to xylene (two 1 h treatments). The subsequently obtained  
91 transparent samples were embedded in melted paraffin for 12 h, after which the  
92 paraffin was replaced with new paraffin and saturated for more than 24 h. The  
93 samples were then embedded in paraffin using plastic molds. Cross-sections of the  
94 embedded roots (with a thickness of approx. 15  $\mu\text{m}$ ) were prepared using an RM2255  
95 microtome (Leica, Germany). For each replication, 10 slides (2 slides per sample)  
96 were prepared and then stained with 1% toluidine blue for 1 min, followed by three  
97 washes in double-distilled water. After inspection for breakage and uniformity, two  
98 sections of each slide were selected for image analysis.

## 99 **Image acquisition and analysis**

100 For the investigation of cell length, fresh primary root tips (approx. 0.8 cm in  
101 length) were longitudinally sliced by hand and stained with 50  $\mu\text{g}/\text{mL}$  propidium  
102 iodide for 10 min. Then, the samples were washed twice and observed using a Zeiss  
103 LSM 800 confocal laser scanning microscope (Germany). The view field was located  
104 up to 400  $\mu\text{m}$  from the root tip border, and images were acquired using an objective  
105 lens with a 10x magnification. To obtain the relative full view of the roots after  
106 propidium iodide staining, 20 lateral roots of each sample were selected and their  
107 images were acquired using the Tiles model of Zeiss LSM 800. Micrographs of  
108 sections were acquired using an Olympus microscope (IX73, Japan) fitted with a  
109 DP80 digital camera under white light using a 10x objective lens. Images of root hairs  
110 were obtained using an Olympus anatomical lens (SZX2-ILLT, Japan) fitted with a  
111 DP71 digital camera under white light using a zoom magnification of 6.4x with its 1x  
112 objective. Three biological replications were established, 5 seedlings of each  
113 replication were used for cell length analysis and 10 seedlings of each replication

114 were used for the analyses of root length and diameter. Images were analyzed for  
115 anatomical traits using Image J software. Cross-sectional diameter and stele diameter  
116 were measured directly, whereas cortex thickness was determined by subtracting the  
117 stele diameter from the cross-sectional diameter. The difference between samples  
118 was based on the Student's t-test.

## 119 **RNA extraction and PCR**

120 To investigate the expression of *Cyclin* genes, which are the marker genes  
121 reflecting cell division activity [11, 12], total RNA was isolated from root tips using  
122 the TRIzol reagent (Invitrogen) and treated with RNase-free DNase I (Takara). An  
123 iScript™ cDNA Synthesis Kit (Bio-Rad) was used to synthesize cDNA, using 3 µg of  
124 total RNA from each sample. Subsequently, quantitative real-time reverse  
125 transcription PCR (qRT-PCR) was performed using SsoFast™ EvaGreen® Supermix  
126 (Bio-Rad) in 96-well optical reaction plates in a Bio-Rad CFX96 Touch™ thermal  
127 cycler. Data were processed as described in our previous publication [13].  
128 Quantification was performed using the  $2^{-\Delta\Delta Ct}$  method [14], where  $\Delta\Delta Ct$  is the  
129 difference in threshold cycles between specific genes and the reference housekeeping  
130 gene eF1a. The primers used for amplification are listed in Table 1.

## 131 **Results**

### 132 **Frontal impedance reduced root length by restricting cell** 133 **division and elongation**

134 At the beginning, maize seedlings were exposed to sand-condition for 3 and 6  
135 days to investigate the effect of sands provided mechanical impedance. Water  
136 cultured seedlings were used as controls. When compared to controls, 3 days'  
137 sand-cultured seedlings did not display obvious changes in root length, but we did  
138 observe a substantial expansion of root diameter, particularly in the region within 3  
139 cm of the root apex, which was newly developed after transplant (Fig 2A, 2B).

140 However, by prolonging growth time to 6 days, we found a significant reduction of  
141 root length under sand-condition (Fig 2A). From this result, it was believable that  
142 elongation restriction and radial expansion were not always accompanying.  
143 Thereafter, 3 days of treatment was chose. Next, cap-fitted-condition was added and  
144 seedlings were treated for 3 days. Small plastic caps were fitted onto root tips to  
145 provide unique frontal impedance. After 3 days of growth, root length, cell length,  
146 expression of *Cyclin* genes (marker genes reflecting cell division activity) and root  
147 diameter, were investigated [11,12]. We found that in plants with plastic caps, root  
148 length was reduced by one-third when compared with that of controls. There was,  
149 however, no statistically significant difference in root length between the  
150 sand-condition seedlings and controls (Fig 2C). At the microscopic and molecular  
151 level, we observed that the presence of plastic cap promoted a marked reduction in  
152 cell length and down-regulated expression of *cyclin B* (Fig 2D, 2E), thereby implying  
153 low cell division activity under frontal impedance. Accordingly, we could deduce that  
154 reductions in cell division and cell length contributed to determining a shorter root  
155 length under frontal impedance. In addition, we observed that a larger number of root  
156 hairs had emerged on the root of sand-condition seedlings than in the cap-fitted  
157 seedlings and controls (Fig 2F).

## 158 **Frontal impedance increased stele diameter but not cortical** 159 **expansion**

160 As to root diameter, significant differences were observed between three kinds  
161 of seedlings (Fig 3, 2C). Notably, the length of plastic-cap-fitted roots was reduced by  
162 one-third compared with those grown in sand, although the root diameter was thinner  
163 in the cap-fitted roots (Fig 3A, 3B). This finding was unexpected and implies that  
164 simple frontal impedance has a slight facilitating effect on radial expansion.  
165 Furthermore, root tips were sliced using a microtome for microexamination. The roots  
166 of sand-condition seedlings displayed remarkable cortical cell expansion compared  
167 with the roots of controls and plastic-cap-fitted roots, and there was no difference

168 between controls and plastic-cap-fitted roots (Fig 3A, 3C). In terms of stele diameter,  
169 plastic-cap-fitted roots were thicker than both water- and sand-condition roots,  
170 whereas there was no difference between water- and sand-condition roots (Fig 3A,  
171 3D). These observations indicate that simple frontal impedance did not induce cortical  
172 expansion, but it did increase the stele diameter of roots.

## 173 **Lateral impedance promoted cortical cell expansion**

174 Given that frontal impedance conferred by the presence of a plastic cap did not  
175 induce notable cortical expansion, the effect of lateral impedance on cortex was  
176 examined. Cylindrical plastic containers were used to provide semi-sand-cultured  
177 conditions (shown in Fig 4A), in which mechanical impedance was imposed only in a  
178 lateral direction. After 3 days of treatment, root diameter and microstructure were  
179 analyzed using the mature region (2 cm below the root–hypocotyl junction). The  
180 results showed that both sand and semi-sand culturing promoted cortical expansion  
181 when compared with the roots of water-condition (Fig 4B, 4D). However, the  
182 increment of cortical expansion at this region was smaller than that in the apical part  
183 of roots grown in sand-condition (Fig 3B, 4C). This difference could be attributable to  
184 that root tip is a newly developed tissue sensing de novo stimuli of lateral impedance  
185 after transplant.

## 186 **Discussion**

187 Considerable evidences have amassed to indicate that mechanical impedance  
188 can reduce the elongation and promote the radial expansion of roots [1,4,5,10].  
189 Nevertheless, all previous studies on mechanical impedance have obtained data from  
190 plants in which the entire root system has been embedded by various substrates, such  
191 as glass beads, soil, sand, and phytigel [1,3-5,10]. In these studies, it was not possible  
192 to distinguish the effects of frontal and lateral impedance, and consequently, root  
193 shortening and thickening always appeared concurrently. In the present study, plastic  
194 caps were used to provide simple frontal impedance on the root tips. Subsequent

195 microstructural observations and expression analysis of cell division marker genes  
196 indicated that reduced cell division and cell length jointly determined the short root  
197 lengths observed under frontal impedance. However, although the presence of plastic  
198 caps resulted in seedlings with shorter roots than those of seedlings cultured in sand,  
199 we found that the diameter of plastic-cap-fitted roots was smaller than that of  
200 sand-condition roots, implying that frontal impedance has a slight facilitating effect  
201 on radial expansion. Mechanical impedance has been demonstrated to increase root  
202 diameter mainly via the expansion of cortical cells [4,15]. Based on our results,  
203 however, simple frontal impedance did not induce the expansion of the cortex,  
204 whereas it did increase the diameter of the stele. Thus, we speculate that the cues  
205 promoting cortical expansion may arise from lateral impedance, such as frictional  
206 impedance. Actually, the frictional resistance between roots and the soil has been  
207 reported to account for up to 80% of the total mechanical impedance [4,9]. Vertical  
208 pressure is, however, considered an unlikely candidate, because it has previously been  
209 reported to constrict radial expansion and compress cortical cells [3,16].

210         The expansion of cortical cells is controlled by the orientation of cortical  
211 microtubules or actin microfilaments and the consequent deposition of cellulose  
212 microfibrils [16-18]. This process is also associated with the secretion of mucilage,  
213 for instance, the treatment of root cap cells with actin microfilament inhibitor was  
214 found to reduce mucilage production, while disorganization of cortical microtubules  
215 has been observed to impair the release of mucilage from seed coat secretory cells  
216 [17,19]. Thus, cortical cell expansion appears to be associated with the process of  
217 mucilage production and consequently overcomes frictional resistance between roots  
218 and sand particles to promote root penetration in sands.

## 219 **Conclusions**

220         We propose that cortical expansion and the consequent thickening of roots are  
221 primarily induced by lateral impedance (friction) rather than frontal impedance when  
222 roots grow in sands.



## 223 **Acknowledgments**

224 We thank Prof. Xuejun Hua for his edit and suggestion. This work was  
225 supported by the National Natural Science Foundation of China (31801371), the  
226 National Ten Thousands Program for Young Top Talent and the International  
227 Cooperative Projects of Sichuan province, China (2017HH0027).

## 228 **References**

- 229 1. Valentine TA, Hallett PD, Binnie K, Young MW, Squire GR, Hawes C, et al. Soil  
230 strength and macropore volume limit root elongation rates in many UK  
231 agricultural soils. *Annals of Botany*. 2012; 110 (2):259-270. doi:  
232 10.1093/aob/mcs118
- 233 2. Bengough AG, Mullins CE. Mechanical impedance to root growth: a review of  
234 experimental techniques and root growth responses. *Journal of Soil Science*. 1990;  
235 41:341-358. doi: 10.1111/j.1365-2389.1990.tb00070.x
- 236 3. Potocka I, Szymanowska Pulka J. Morphological responses of plant roots to  
237 mechanical stress. *Annals of Botany*. 2018; 122 (5):711-723. doi:  
238 10.1093/aob/mcy010
- 239 4. Bengough AG, McKenzie BM, Hallett PD, Valentine TA. Root elongation, water  
240 stress, and mechanical impedance: a review of limiting stresses and beneficial root  
241 tip traits. *Journal of Experimental Botany*. 2011; 62 (1):59-68. doi:  
242 10.1093/jxb/erq350
- 243 5. Santisree P, Nongmaithem S, Sreelakshmi Y, Ivanchenko MG, Sharma R. The  
244 root as a drill: An ethylene-auxin interaction facilitates root penetration in soil.  
245 *Plant Signaling & Behavior*. 2012; 7 (2):1-6. doi: 10.4161/psb.7.2.18936
- 246 6. Chen G, Weil RR. Penetration of cover crop roots through compacted soils. *Plant*  
247 *and Soil*. 2009; 331 (1-2):31-43. doi: 10.1007/s11104-009-0223-7
- 248 7. Materechera SA, Alston AM, Kirby JM, Dexter AR. Influence of root diameter on  
249 the penetration of seminal roots into a compacted subsoil. *Plant and Soil*. 1992;  
250 144:297-303. doi: 10.1007/BF00012888
- 251 8. Clark LJ, Price AH, Steele KA, Whalley WR. Evidence from near-isogenic lines

- 252 that root penetration increases with root diameter and bending stiffness in rice.  
253 *Functional Plant Biology*. 2008; 35:1163–1171. doi: 10.1071/FP08132
- 254 9. Bengough AG, McKenzie BM. Sloughing of root cap cells decreases the frictional  
255 resistance to maize (*Zea mays* L.) root growth. *Journal of Experimental Botany*.  
256 1997; 48 (309):885-893. doi: 10.1093/jxb/48.4.885
- 257 10. Barlow PW. The Root Cap: Cell Dynamics, Cell Differentiation and Cap  
258 Function. *Journal of Plant Growth Regulation*. 2003; 21 (4):261-286. doi:  
259 10.1007/s00344-002-0034-z
- 260 11. Zhang M, Wang C, Lin Q, Liu A, Wang T, Feng X, et al. A tetratricopeptide  
261 repeat domain-containing protein SSR1 located in mitochondria is involved in  
262 root development and auxin polar transport in Arabidopsis. *Plant Journal*. 2015;  
263 83 (4):582-599. doi: 10.1111/tbj.12911
- 264 12. Vandepoele K. Genome-Wide Analysis of Core Cell Cycle Genes in Arabidopsis.  
265 *Plant Cell*. 2002; 14 (4):903-916. doi: 10.1105/tpc.010445
- 266 13. Feng XJ, Li JR, Qi SL, Lin QF, Jin JB, Hua XJ. Light affects salt stress-induced  
267 transcriptional memory of *P5CS1* in Arabidopsis. *Proceedings of the National*  
268 *Academy of Sciences of the United States of America*. 2016; 113  
269 (51):E8335-E8343. doi: 10.1073/pnas.1610670114
- 270 14. Livak KJ, Schmittgen TD. Analysis of relative gene expression data using  
271 real-time quantitative PCR and the 2(-Delta Delta C(T)) Method. *Methods*. 2001;  
272 25 (4):402-408. doi: 10.1006/meth.2001.1262
- 273 15. Williamson RE. Alignment of Cortical Microtubules by Anisotropic Wall  
274 Stresses. *Functional Plant Biology*. 1990; 17:601-613. doi: 10.1071/PP9900601
- 275 16. Kolb E, Hartmann C, Genet P. Radial force development during root growth  
276 measured by photoelasticity. *Plant and Soil*. 2012; 360 (1-2):19-35. doi:  
277 10.1007/s11104-012-1316-2
- 278 17. Himmelspach R, Williamson RE, Wasteneys GO. Cellulose microfibril alignment  
279 recovers from DCB-induced disruption despite microtubule disorganization. *Plant*  
280 *Journal*. 2003; 36:565-575. doi: 10.1046/j.1365-313X.2003.01906.x
- 281 18. Veen BW. The influence of mechanical impedance on the growth of maize roots.

282 *Plant and Soil*. 1982; 66:101-109. doi: 10.1007/BF02203407

283 19. McFarlane HE, Young RE, Wasteneys GO, Samuels AL. Cortical microtubules  
284 mark the mucilage secretion domain of the plasma membrane in Arabidopsis seed  
285 coat cells. *Planta*. 2008; 227 (6):1363-1375. doi: 10.1007/s00425-008-0708-2

286

287

288

289

290

291 Table 1. Primers used for quantitative real-time reverse transcription PCR  
292 (qRT-PCR).

| Genes        | Forward primer           | Reverse primer         |
|--------------|--------------------------|------------------------|
| <i>eFla</i>  | TGGGCCTACTGGTCTTACTACTGA | ACATACCCACGCTTCAGATCCT |
| <i>CYCI</i>  | ACGTTGAGGACATCTACACATT   | TATTGTGAGGTAGAGCGTTTCC |
| <i>CYCB1</i> | TAGTACTCAGCTCCGATTCTGA   | ATGTCATCGACCACTTGTCTAG |

293

294 Fig 1. Schematic diagram of treatment conditions. (A) Root tip in plastic cap. (B) root  
295 in cylindrical plastic container. It is water-, cap-fitted-, semi-sand and sand-condition  
296 from (C) to (F) successively. Black points in (B) and (F) represent silica sands.

297 Fig 2. Frontal impedance reduced root length by restricting cell division and  
298 elongation. Root length (A) and diameter (B) after 3 or 6 days of growth in water-  
299 (W) and sand- (S) conditions. (C) Root length after 3 days of growth under W, S, and  
300 plastic-cap-fitted (PC) conditions. (D) Confocal micrographs of primary root tips after  
301 propidium iodide (PI) staining (left: W, right: PC) and cell length after 3 days of  
302 growth under W and PC conditions. The yellow scale bars represent 100  $\mu\text{m}$ . (E)  
303 Expression level of two *Cyclin* genes (cell division marker genes) and *eFla* as an  
304 internal control. (F) Root hairs on primary root viewed under an anatomical lens

305 (from left to right: W, S, and PC). \*\*P < 0.01; \*P < 0.05; ns: non-significant.

306 Fig 3. Root diameter (A), cortical thickness (B) and stele diameter (C) of root tips.

307 Micrographs of a cross-section under water-, sand- and plastic-cap-fitted conditions

308 from (D) to (F) successively. The red scale bars represent 100  $\mu\text{m}$ . \*\*P < 0.01; \*P <

309 0.05. W, S and PC represent water-, sand-, and plastic-cap-fitted conditions,

310 respectively.

311 Fig 4. Root diameter (A), cortical thickness (B) and stele diameter (C) of mature

312 region. Micrographs of cross-sections under water-, sand- and semi-sand- conditions

313 from (D) to (F) successively. The red scale bars represent 100  $\mu\text{m}$ . \*\*P < 0.01. W, S

314 and SS represent water-, sand- and semi-sand- conditions, respectively.

315

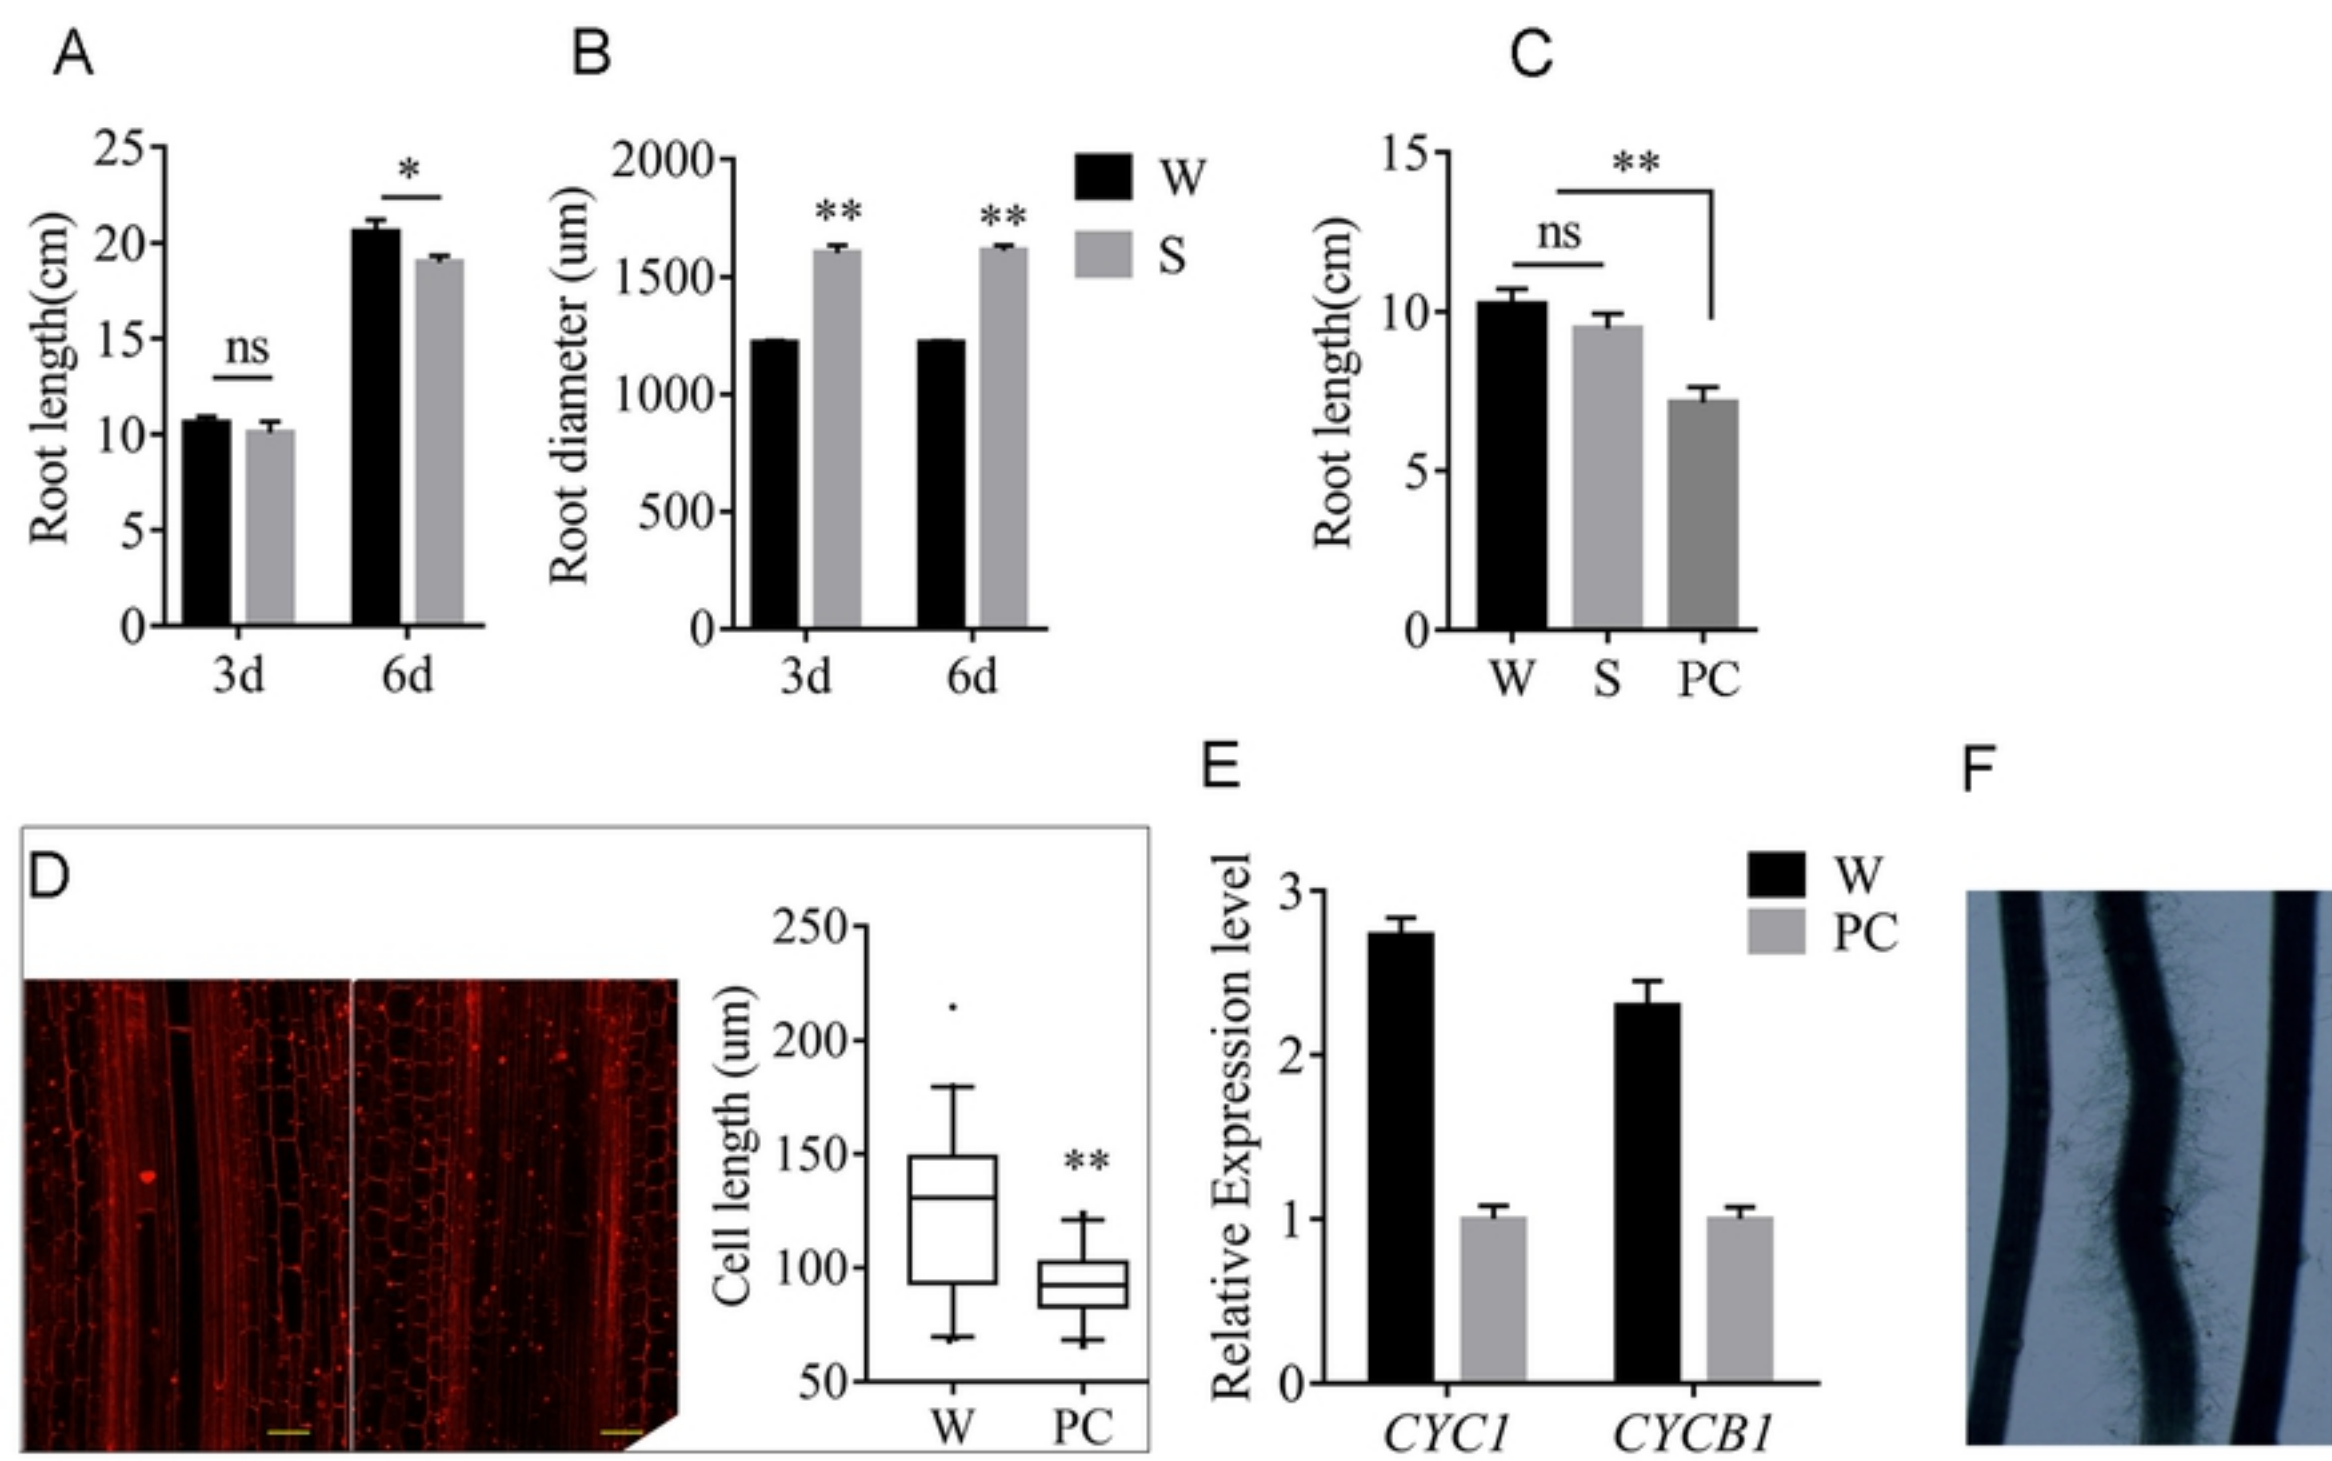

Fig 2

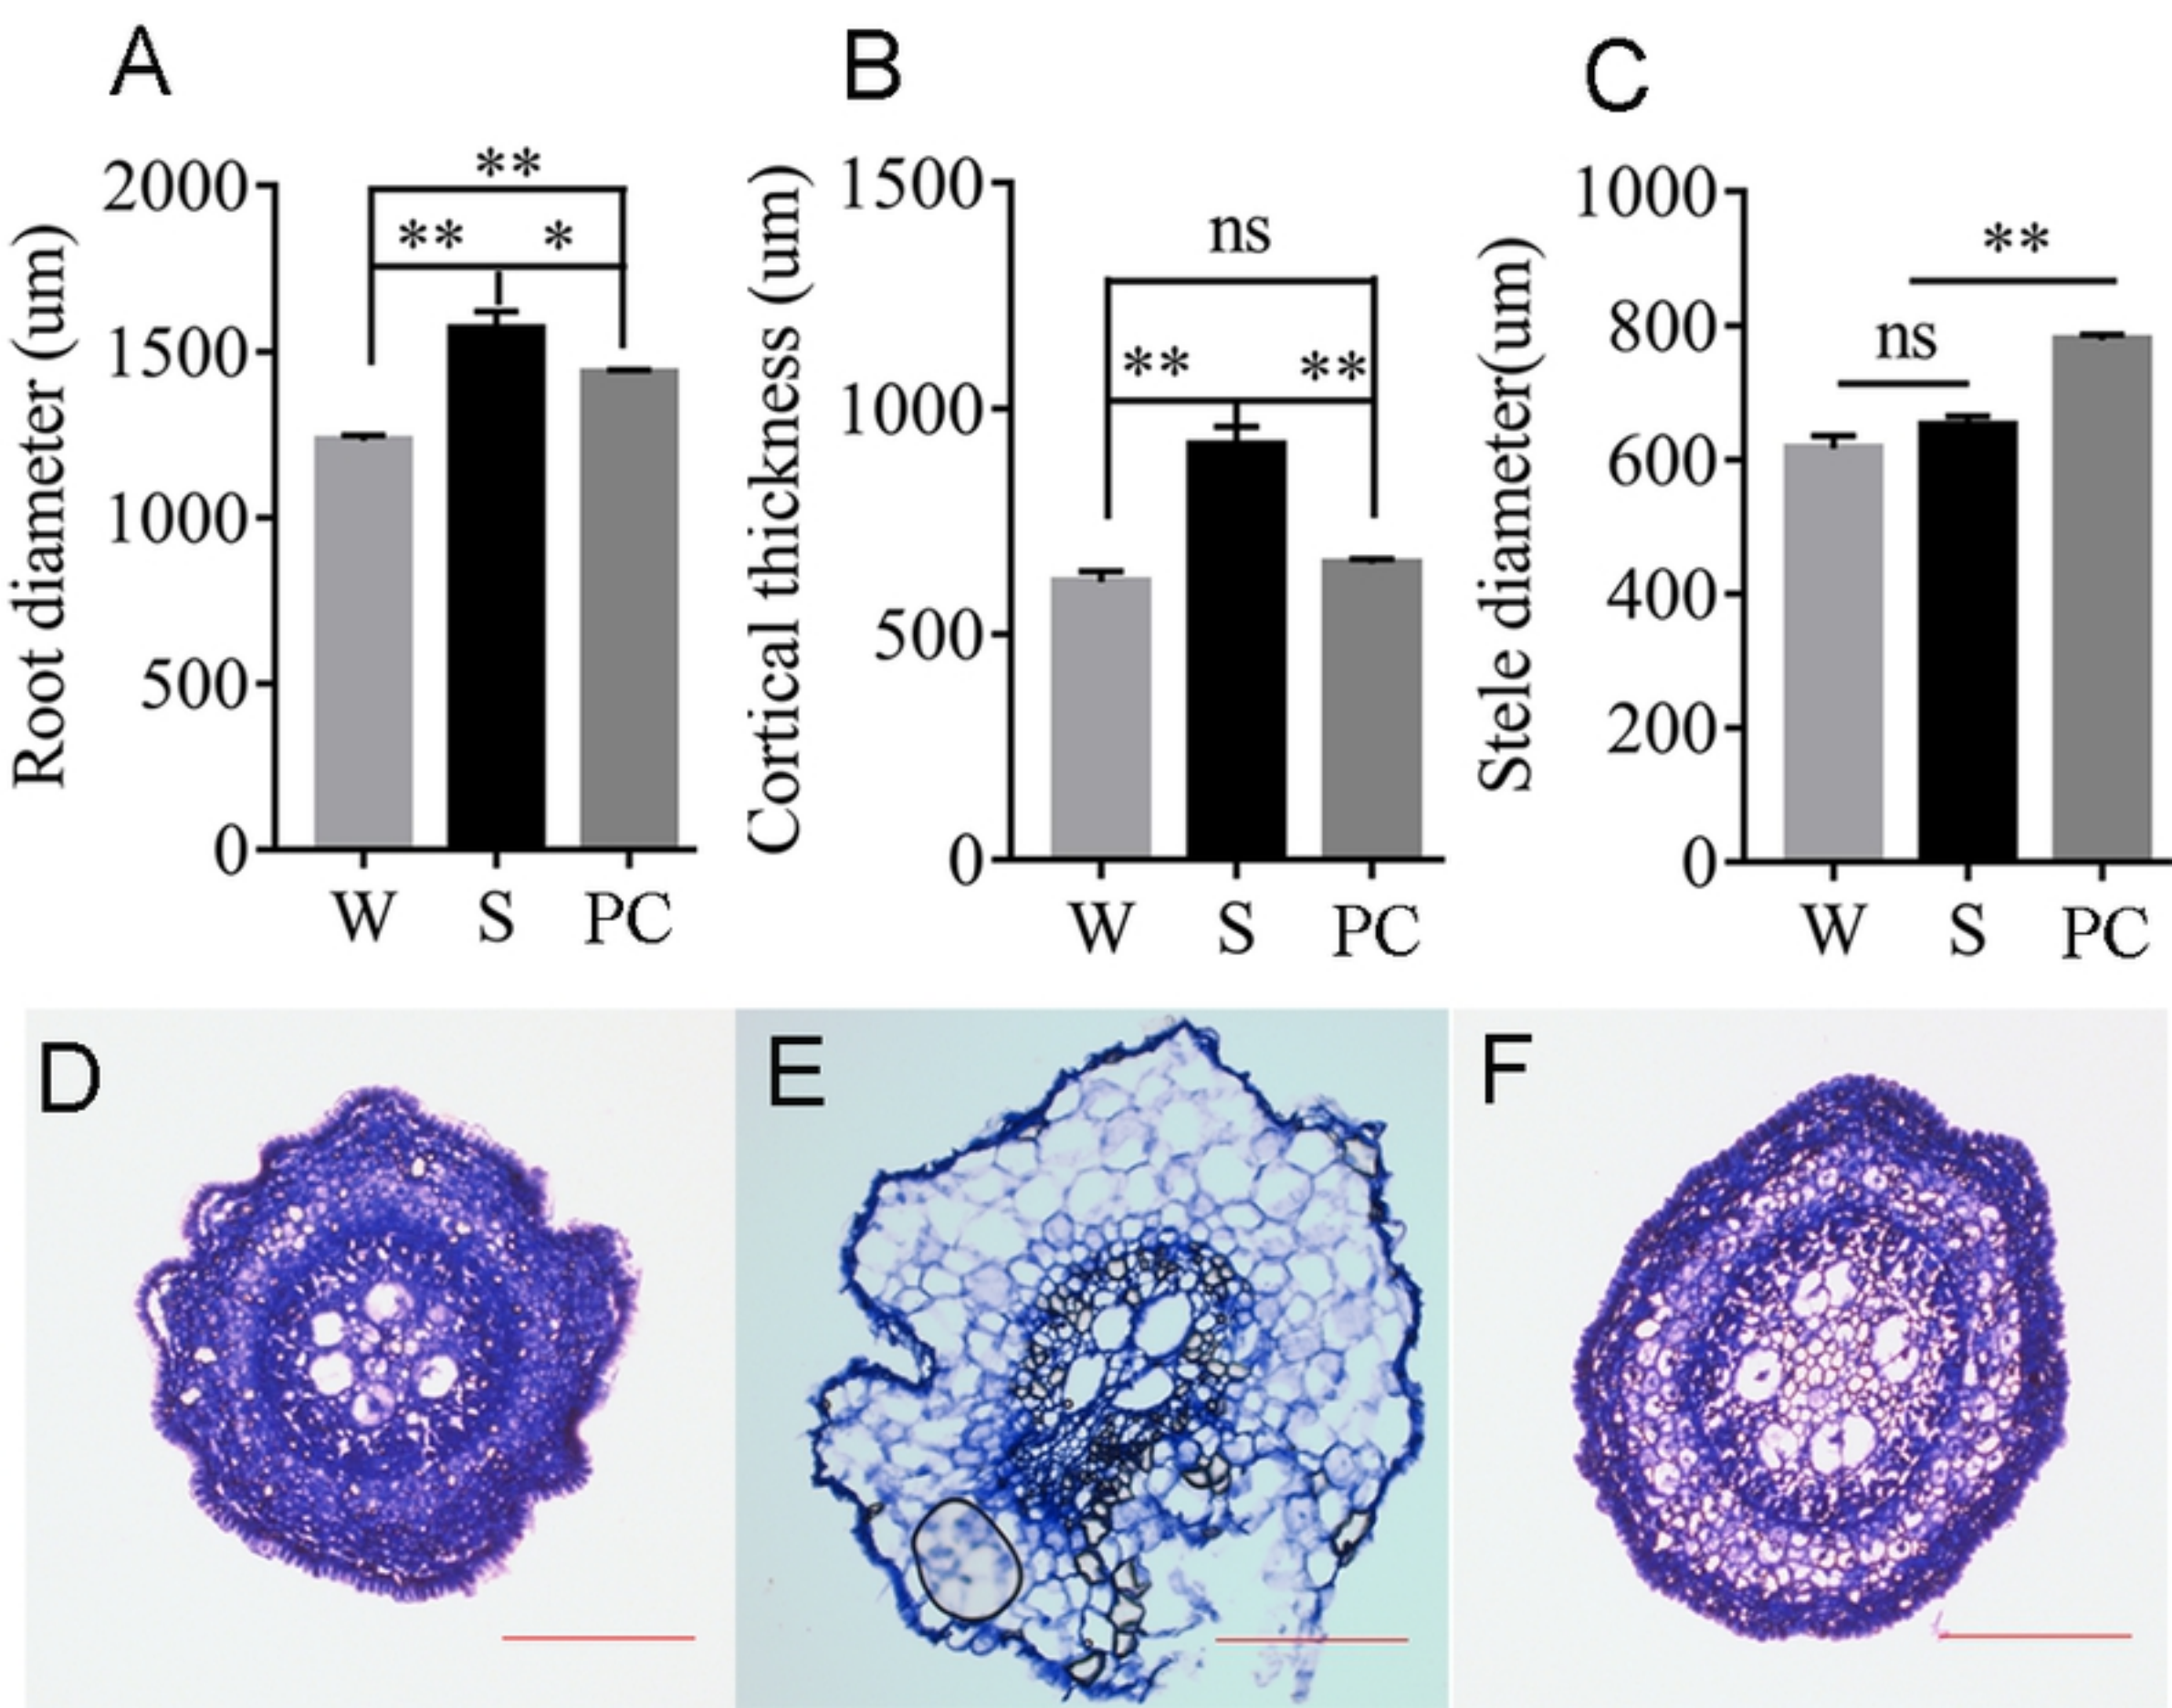

Fig 3

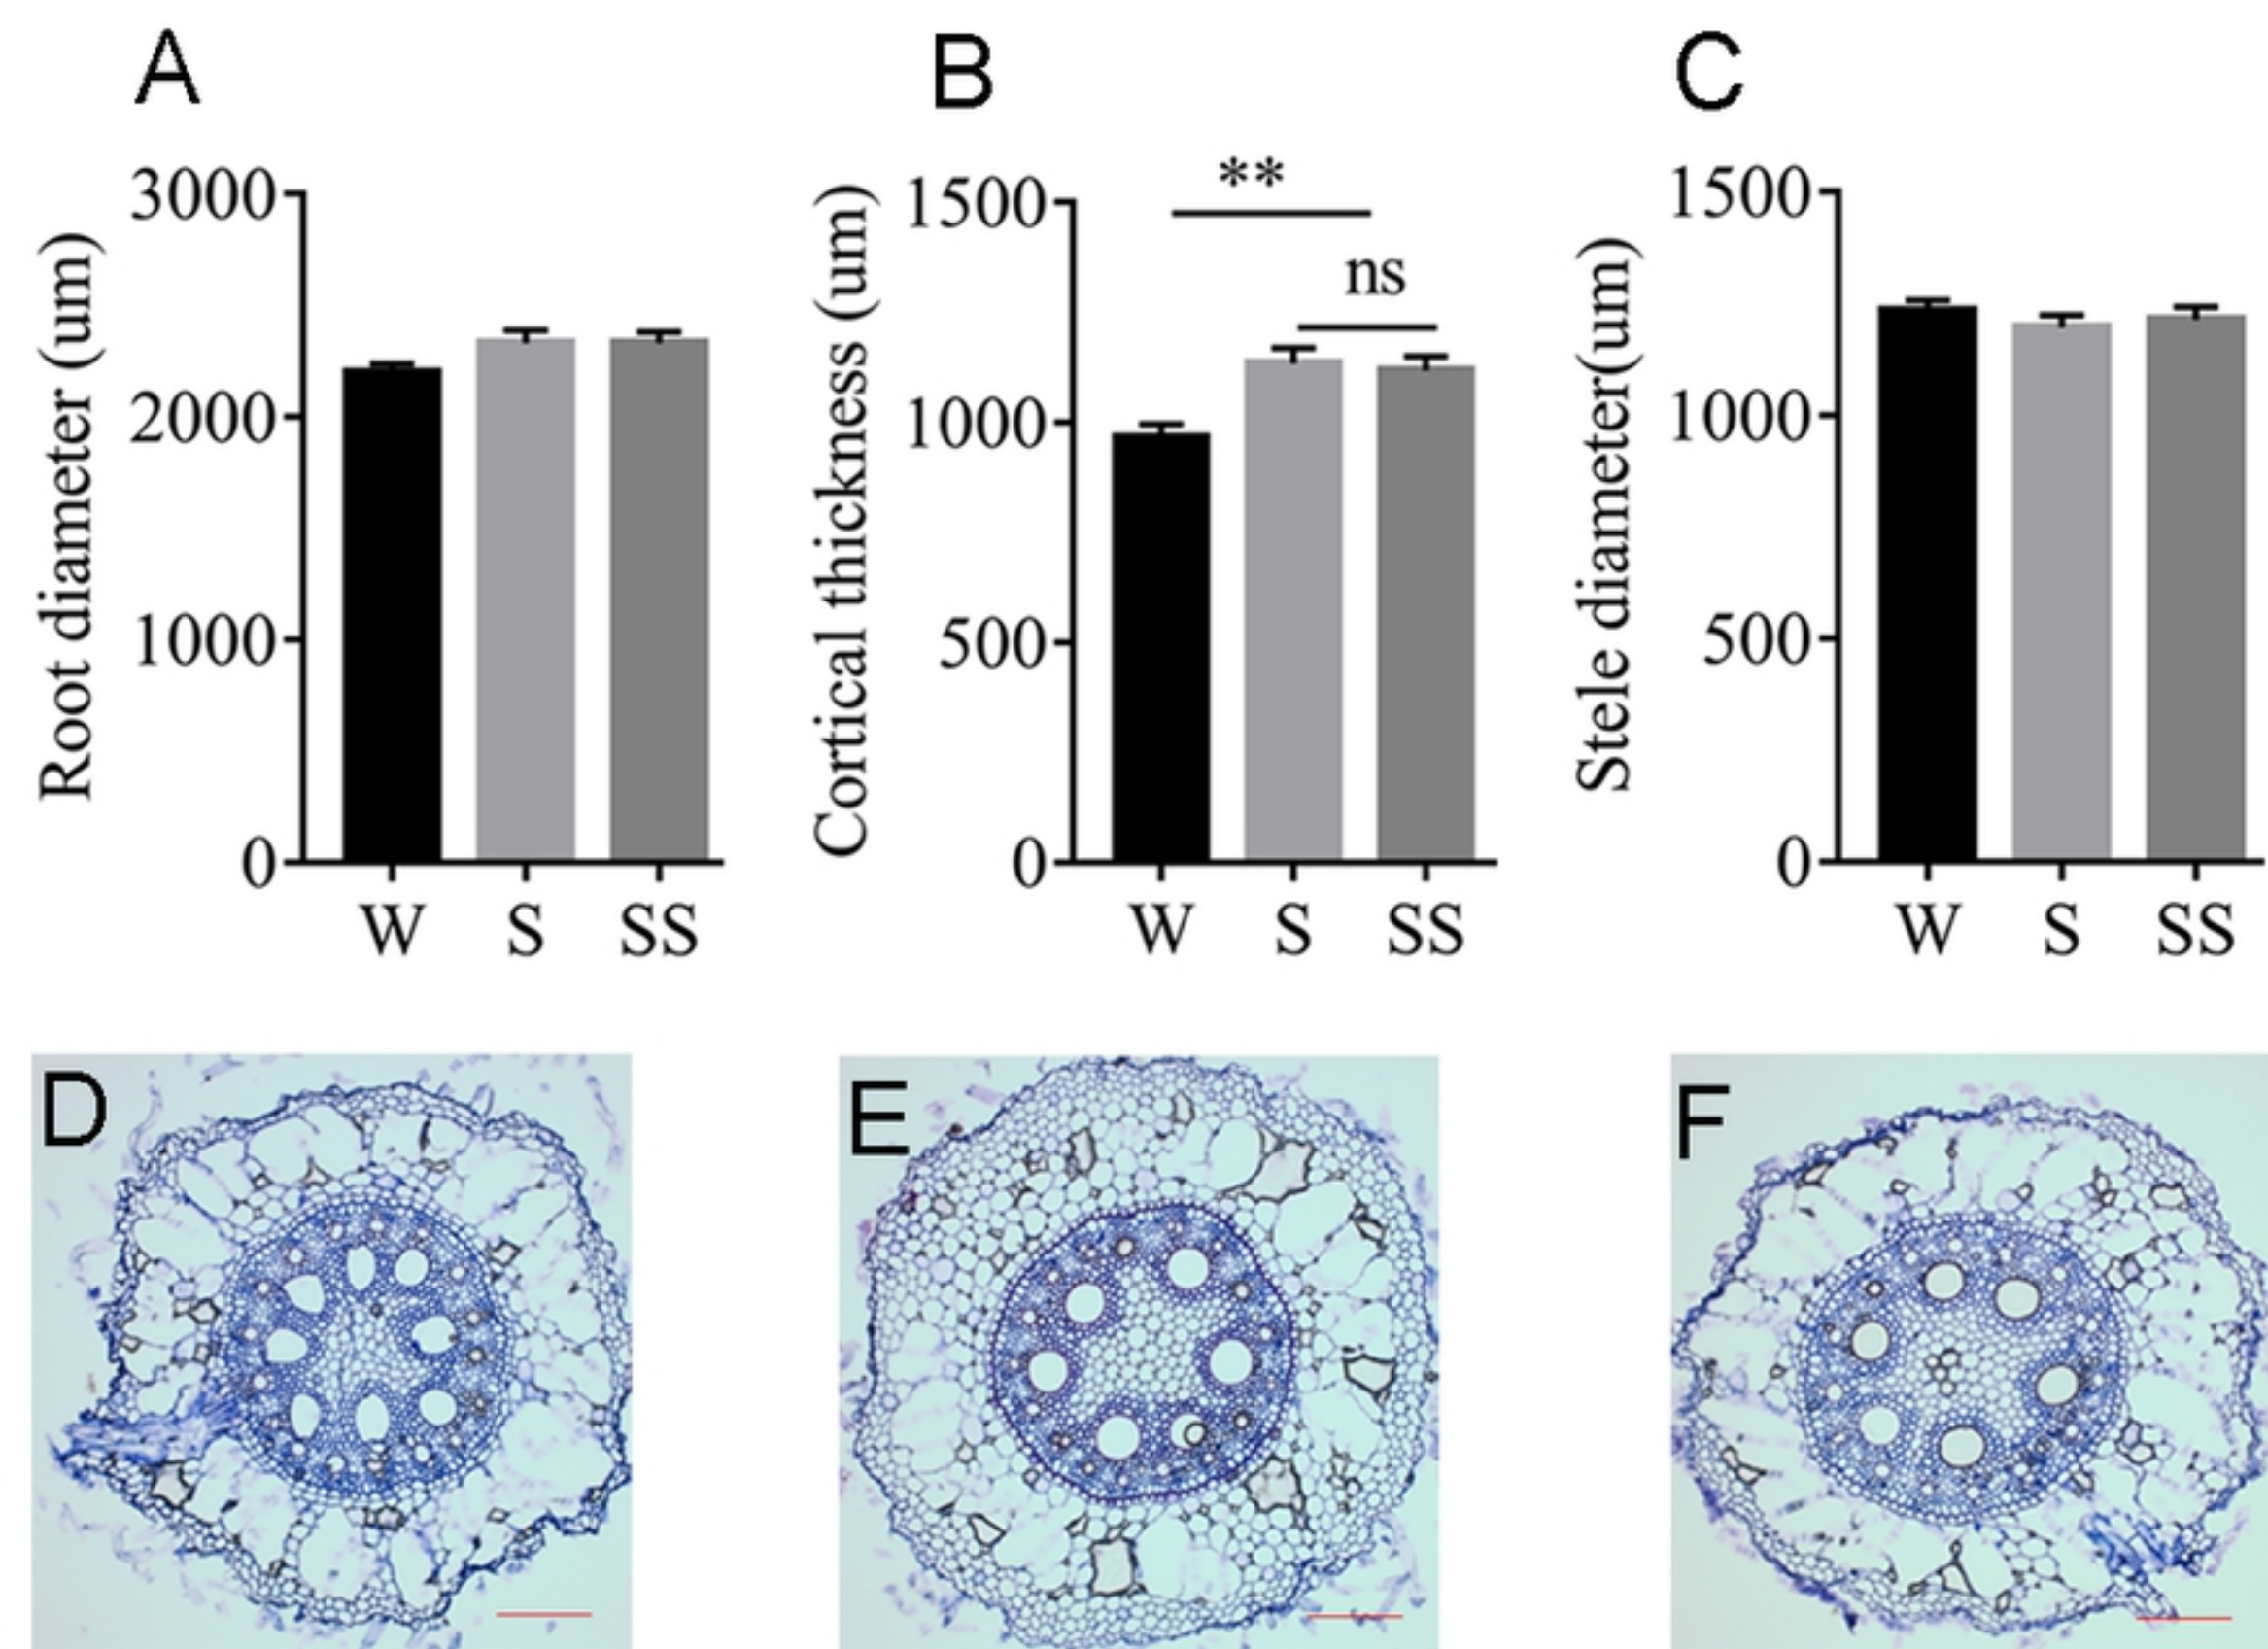

Fig 4

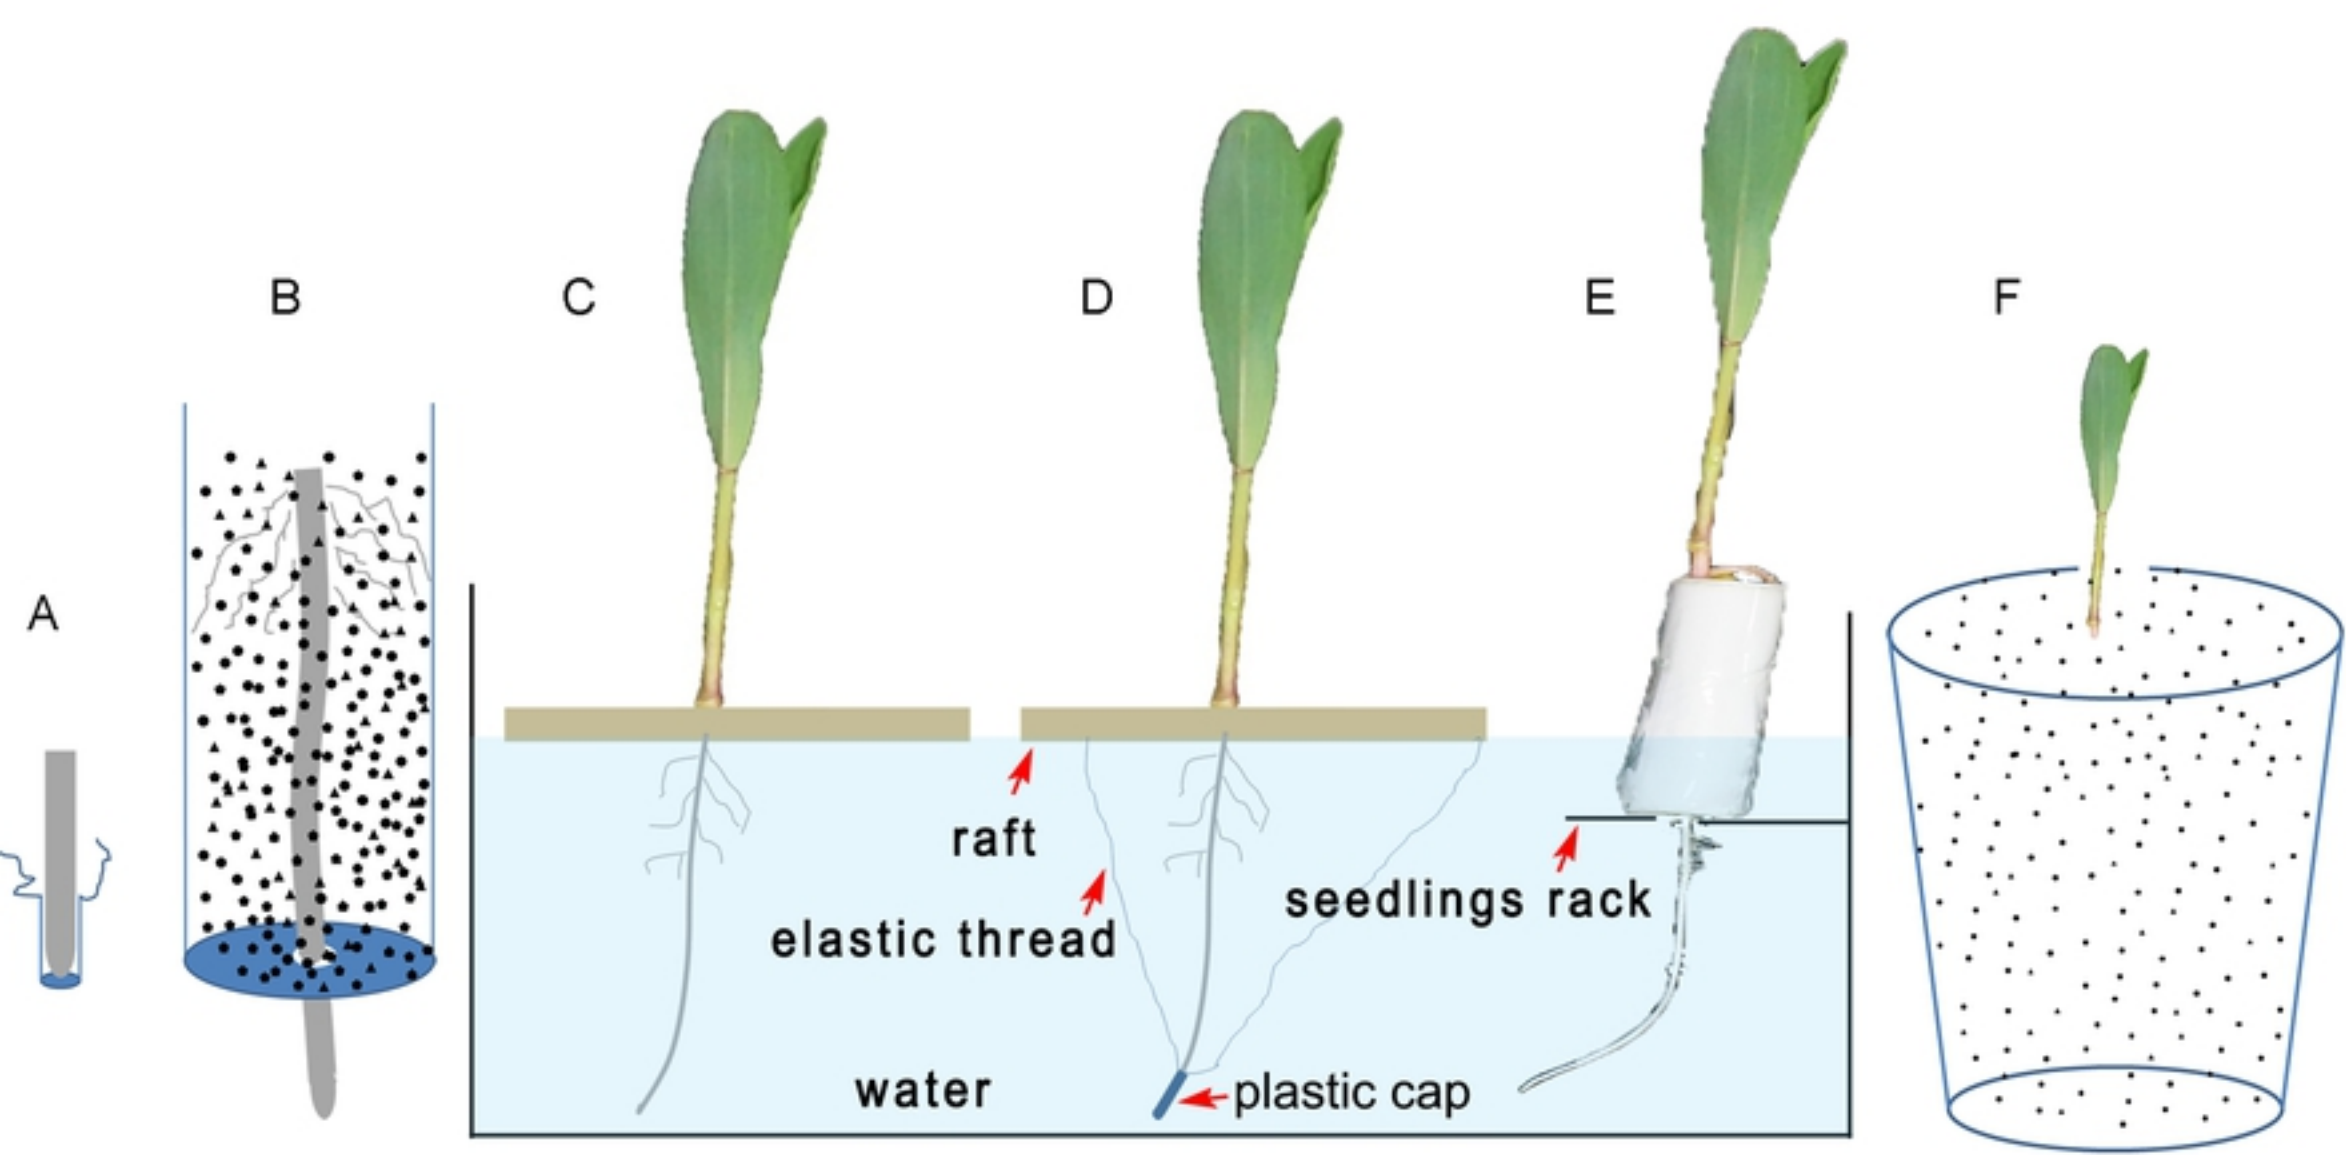

Fig 1
